# Supplementary material
Source: PubMed Central journal article supplement (PMC11108308)
Supplement: 18_2016_2230_MOESM1_ESM.pdf [file 18_2016_2230_MOESM1_ESM.pdf]

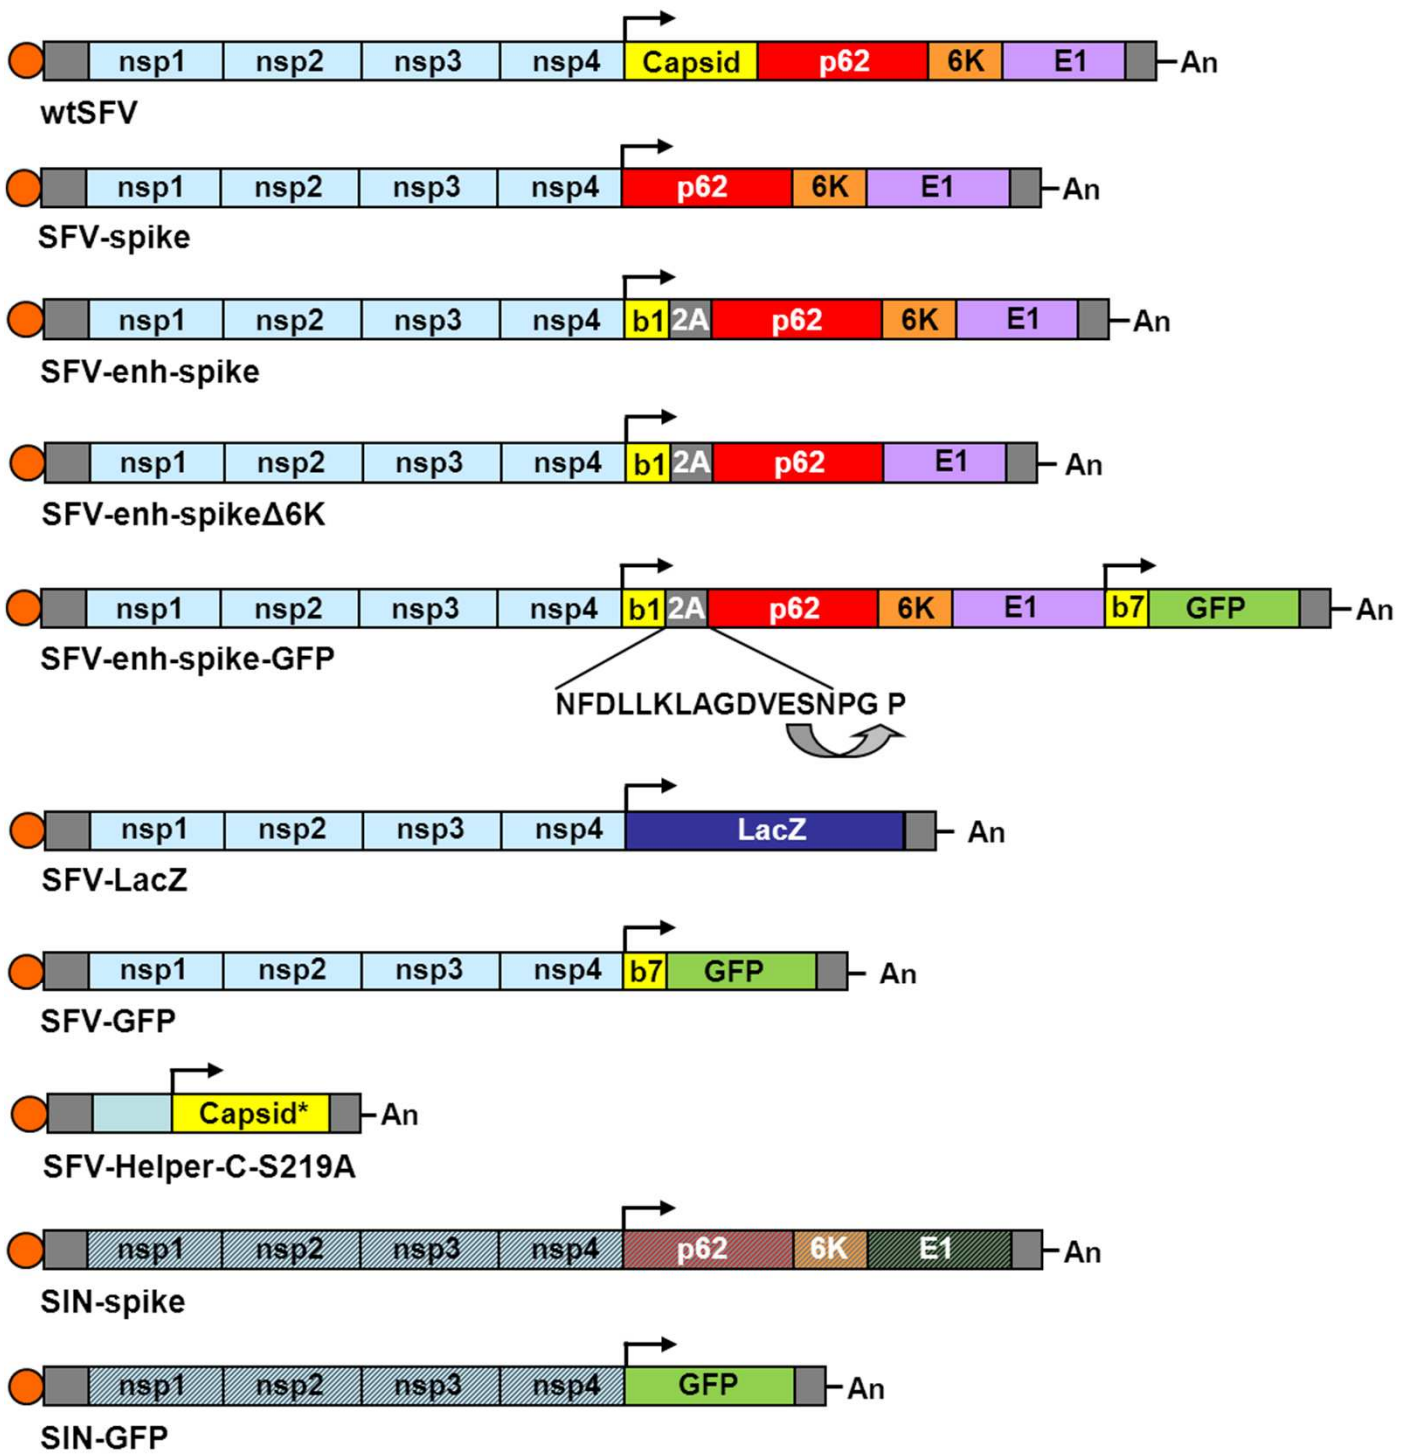

Supplementary Fig. 1

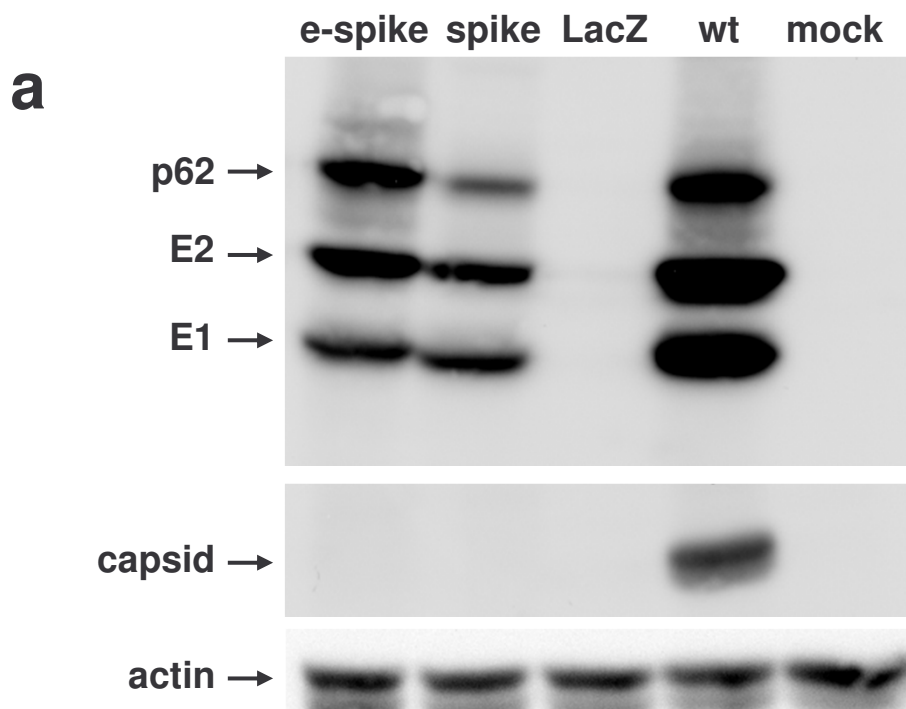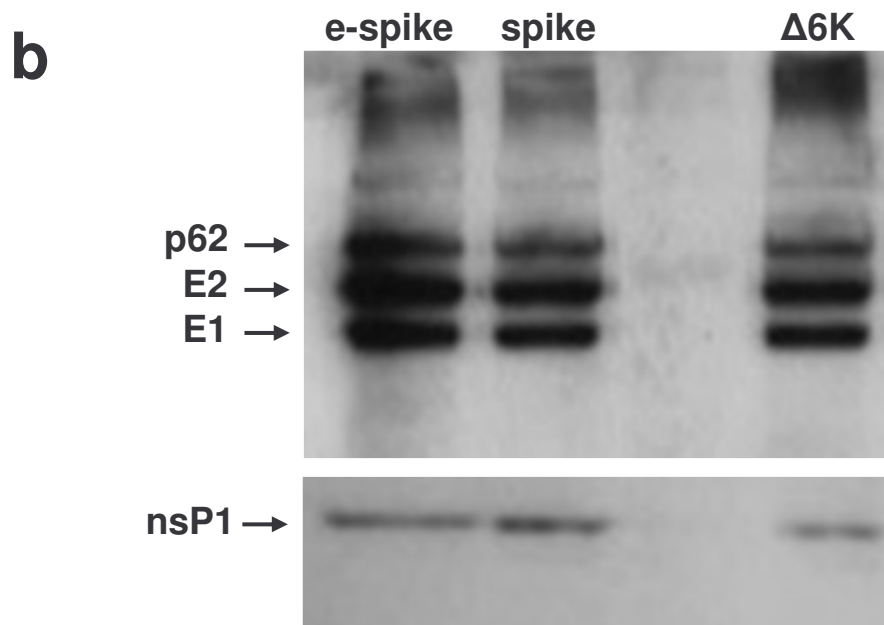

Supplementary Fig. 2

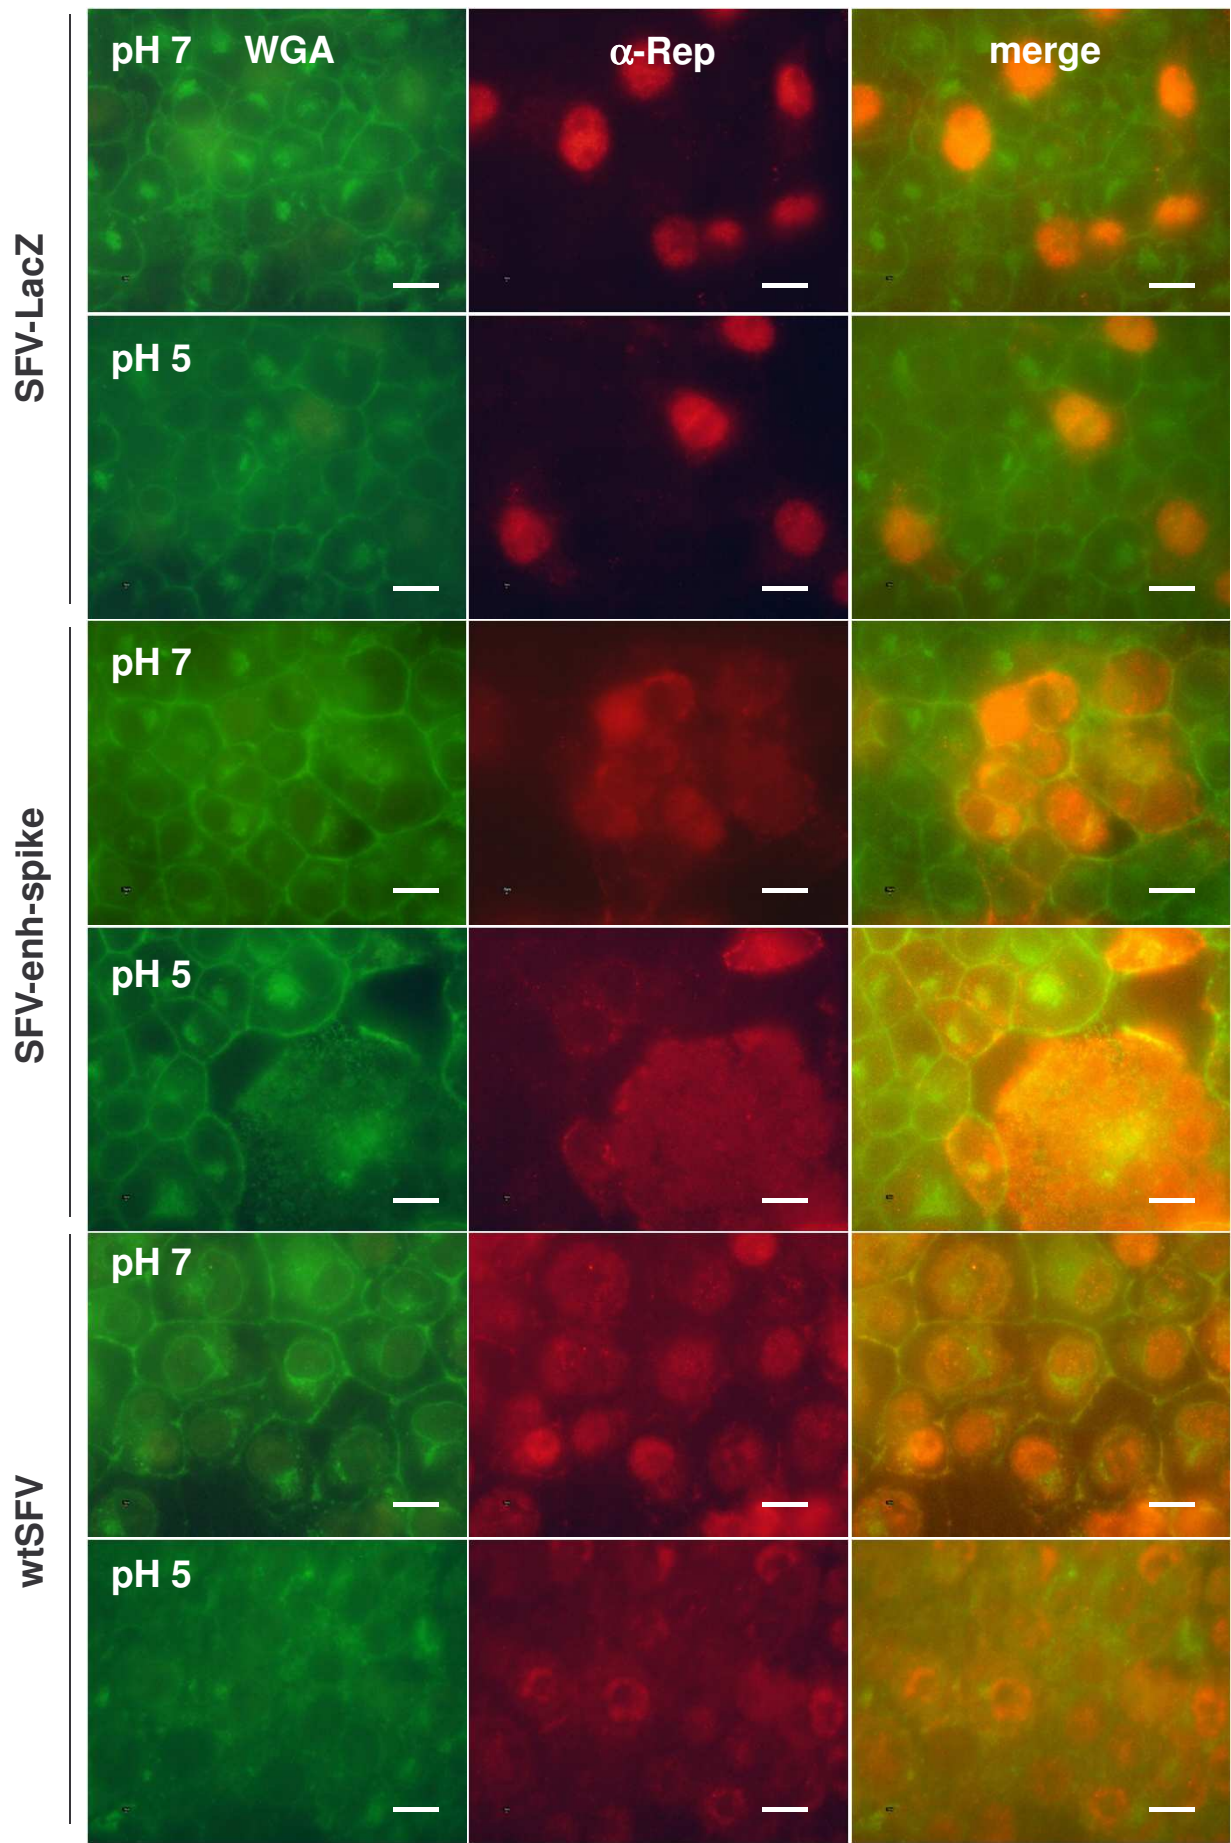

Supplementary Fig. 3

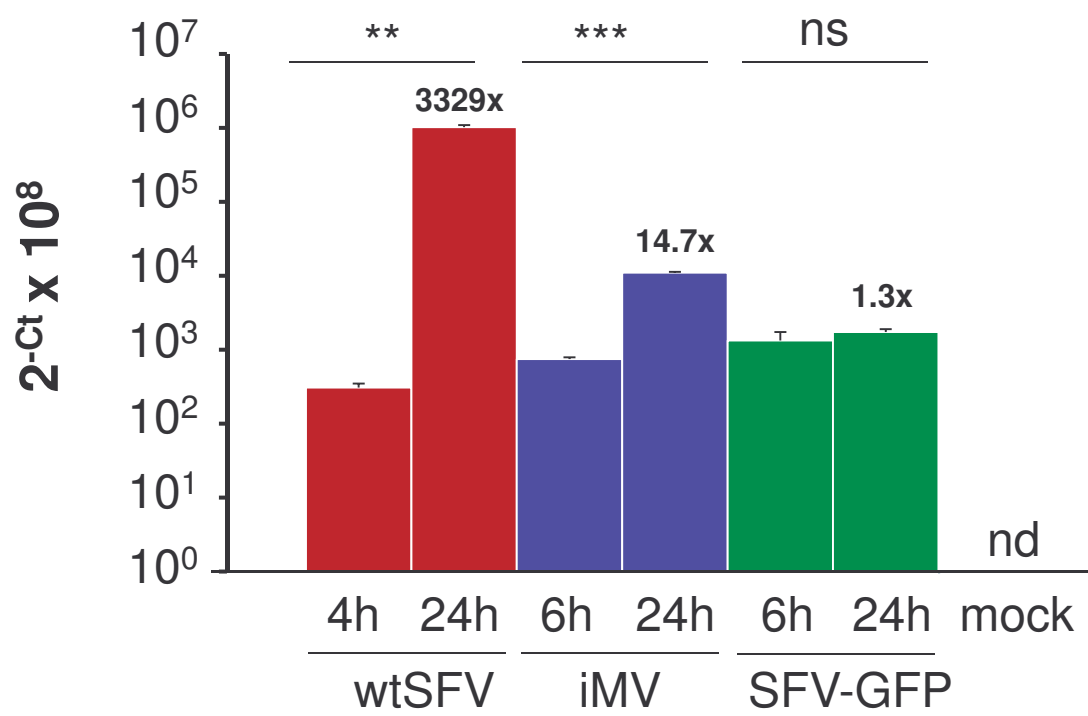

Supplementary Fig. 4

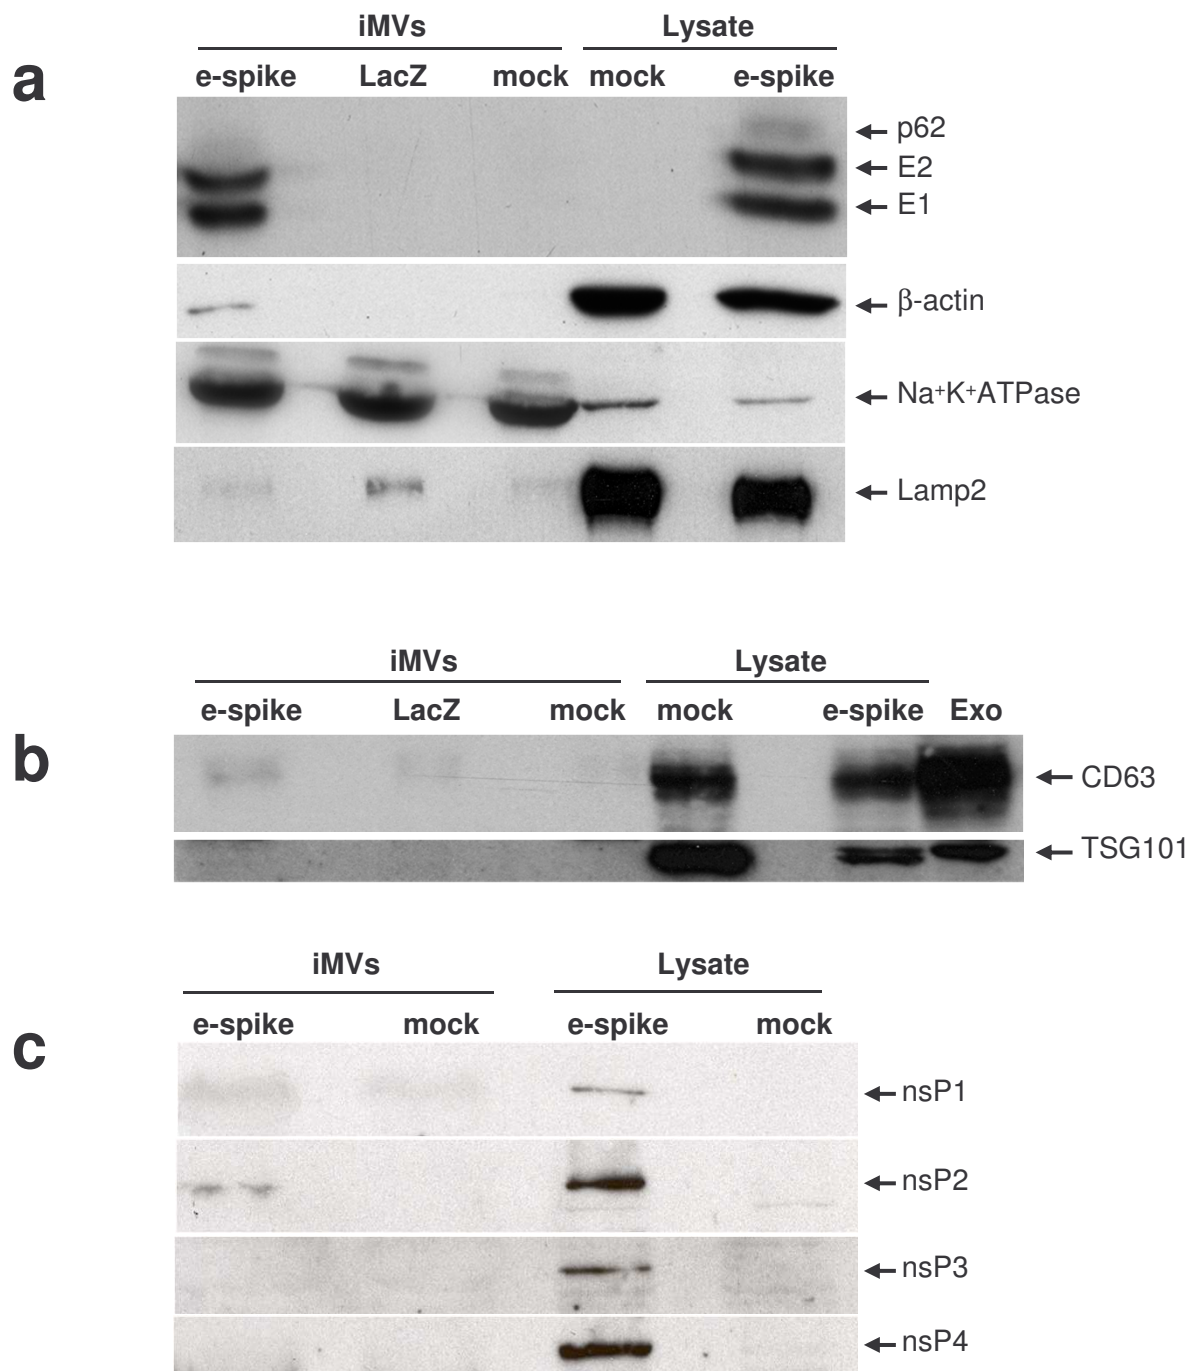

Supplementary Fig. 5

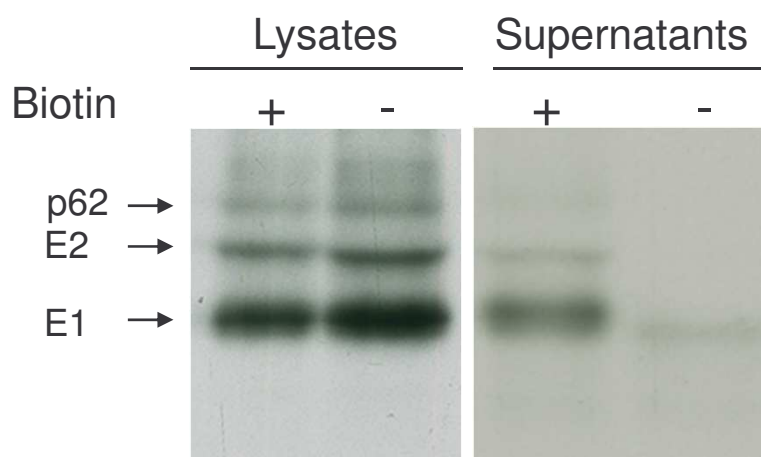

Supplementary Fig. 6



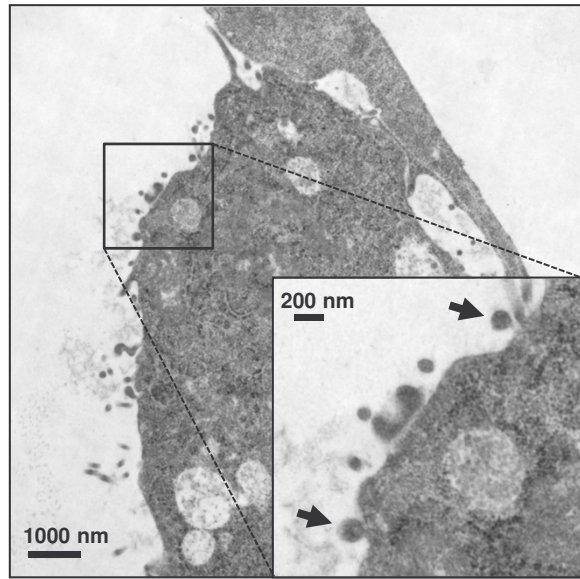

**SFV-spike**

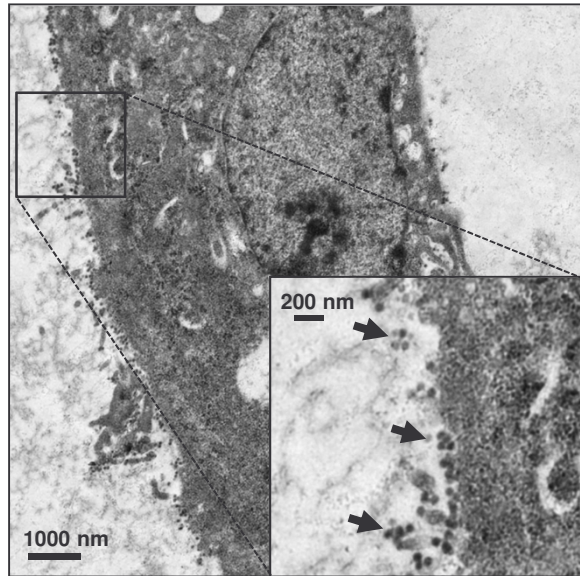

**wtSFV**

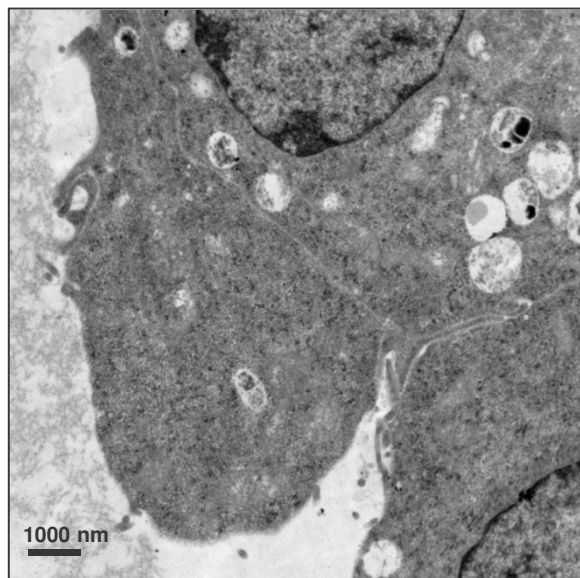

**mock**

**Supplementary Fig. 7**
